# Supplementary material for: Kissing Bug Intrusions into Homes in the Southwest United States
Source: MDPI journal article supplement (doi:10.3390/insects12070654), 2021-07-17

University of Arizona  
Center for Biomedical Informatics & Biostatistics

Tucson Kissing bug Project Home and Personal Evaluation

Data Exports, Reports, and Stats

All data (all records and fields)

Data entry volunteer: (Please put first name, initial of last name)  
Example: Norman Beatty: NormanB (data\_entry\_vol)

| Total Count (N) | Missing                  |
|-----------------|--------------------------|
| 77              | <a href="#">1 (1.3%)</a> |

Household Identification Number: (Survey ID) (house\_id)

| Total Count (N) | Missing  |
|-----------------|----------|
| 78              | 0 (0.0%) |

Date of survey complete: (MM/DD/YY) (date\_survey)

| Total Count (N) | Missing                  |
|-----------------|--------------------------|
| 77              | <a href="#">1 (1.3%)</a> |

How long have you lived in your home? (years) (home\_how\_long\_years)

| Total Count (N) | Missing                  | Unique |
|-----------------|--------------------------|--------|
| 72              | <a href="#">6 (7.7%)</a> | 33     |

Counts/frequency: < 1 (1, 1.4%), 1 (3, 4.2%), 2 (6, 8.3%), 3 (4, 5.6%), 4 (1, 1.4%), 5 (4, 5.6%), 6 (3, 4.2%), 7 (1, 1.4%), 8 (2, 2.8%), 9 (2, 2.8%), 10 (3, 4.2%), 11 (3, 4.2%), 12 (2, 2.8%), 13 (5, 6.9%), 14 (3, 4.2%), 15 (1, 1.4%), 16 (4, 5.6%), 17 (0, 0.0%), 18 (3, 4.2%), 19 (1, 1.4%), 20 (4, 5.6%), 21 (1, 1.4%), 22 (1, 1.4%), 23 (0, 0.0%), 24 (2, 2.8%), 25 (0, 0.0%), 26 (0, 0.0%), 27 (0, 0.0%), 28 (1, 1.4%), 29 (2, 2.8%), 30 (0, 0.0%), 31 (0, 0.0%), 32 (0, 0.0%), 33 (1, 1.4%), 34 (1, 1.4%), 35 (1, 1.4%), 36 (0, 0.0%), 37 (1, 1.4%), 38 (0, 0.0%), 39 (0, 0.0%), 40 (2, 2.8%), 41 (0, 0.0%), 42 (1, 1.4%), 43 (0, 0.0%), 44 (0, 0.0%), 45 (0, 0.0%), 46 (0, 0.0%), 47 (1, 1.4%), 48 (1, 1.4%), 49 (0, 0.0%), 50 (0, 0.0%), 51 (0, 0.0%), 52 (0, 0.0%), 53 (0, 0.0%), 54 (0, 0.0%), 55 (0, 0.0%), 56 (0, 0.0%), 57 (0, 0.0%), 58 (0, 0.0%), 59 (0, 0.0%), 60 (0, 0.0%), 61 (0, 0.0%), 62 (0, 0.0%), 63 (0, 0.0%), 64 (0, 0.0%), 65 (0, 0.0%), 66 (0, 0.0%), 67 (0, 0.0%), 68 (0, 0.0%), 69 (0, 0.0%), 70 (0, 0.0%), 71 (0, 0.0%), 72 (0, 0.0%), 73 (0, 0.0%), 74 (0, 0.0%), 75 (0, 0.0%), 76 (0, 0.0%), 77 (0, 0.0%), 78 (0, 0.0%), 79 (0, 0.0%), 80 (0, 0.0%), >80 (0, 0.0%)

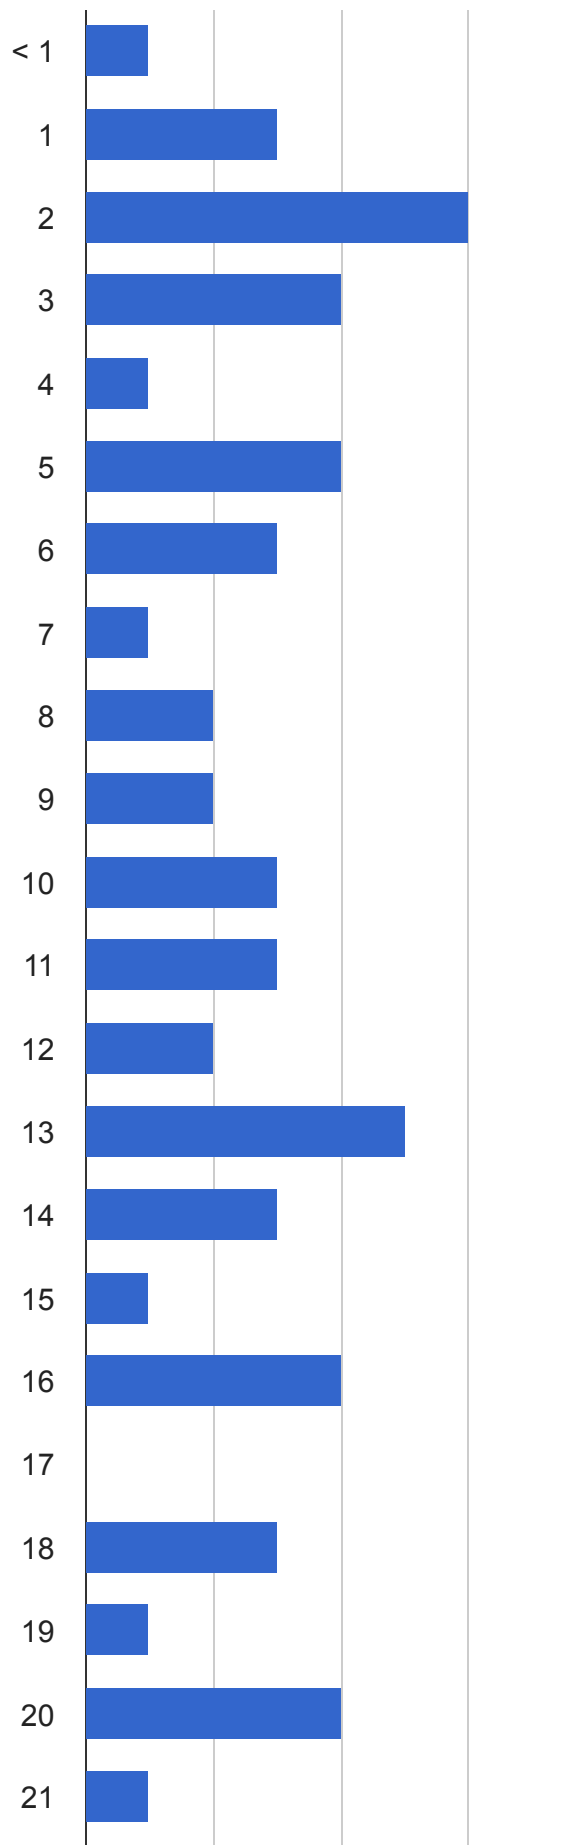

Download image

Do you own or rent? *(home\_or\_rent)*

| Total Count (N) | Missing  | Unique |
|-----------------|----------|--------|
| 74              | 4 (5.1%) | 2      |

Counts/frequency: Own (65, 87.8%), Rent (9, 12.2%)

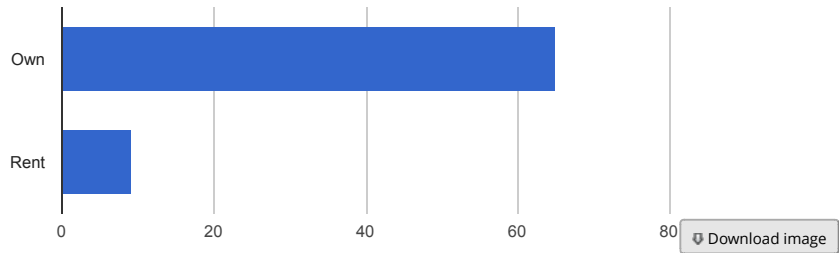

Approximately how old is your home? (years) *(home\_how\_old\_yrs)*

| Total Count (N) | Missing  | Unique |
|-----------------|----------|--------|
| 76              | 2 (2.6%) | 43     |

Counts/frequency: < 1 (0, 0.0%), 1 (0, 0.0%), 2 (2, 2.6%), 3 (0, 0.0%), 4 (0, 0.0%), 5 (0, 0.0%), 6 (1, 1.3%), 7 (1, 1.3%), 8 (0, 0.0%), 9 (1, 1.3%), 10 (1, 1.3%), 11 (1, 1.3%), 12 (2, 2.6%), 13 (0, 0.0%), 14 (2, 2.6%), 15 (3, 3.9%), 16 (2, 2.6%), 17 (1, 1.3%), 18 (1, 1.3%), 19 (1, 1.3%), 20 (5, 6.6%), 21 (0, 0.0%), 22 (0, 0.0%), 23 (0, 0.0%), 24 (2, 2.6%), 25 (3, 3.9%), 26 (2, 2.6%), 27 (0, 0.0%), 28 (0, 0.0%), 29 (1, 1.3%), 30 (2, 2.6%), 31 (0, 0.0%), 32 (1, 1.3%), 33 (1, 1.3%), 34 (1, 1.3%), 35 (6, 7.9%), 36 (1, 1.3%), 37 (1, 1.3%), 38 (1, 1.3%), 39 (0, 0.0%), 40 (8, 10.5%), 41 (1, 1.3%), 42 (1, 1.3%), 43 (0, 0.0%), 44 (0, 0.0%), 45 (3, 3.9%), 46 (0, 0.0%), 47 (1, 1.3%), 48 (1, 1.3%), 49 (0, 0.0%), 50 (1, 1.3%), 51 (1, 1.3%), 52 (0, 0.0%), 53 (0, 0.0%), 54 (2, 2.6%), 55 (0, 0.0%), 56 (1, 1.3%), 57 (1, 1.3%), 58 (0, 0.0%), 59 (0, 0.0%), 60 (3, 3.9%), 61 (0, 0.0%), 62 (0, 0.0%), 63 (0, 0.0%), 64 (0, 0.0%), 65 (1, 1.3%), 66 (1, 1.3%), 67 (0, 0.0%), 68 (0, 0.0%), 69 (0, 0.0%), 70 (2, 2.6%), 71 (0, 0.0%), 72 (0, 0.0%), 73 (0, 0.0%), 74 (0, 0.0%), 75 (0, 0.0%), 76 (0, 0.0%), 77 (0, 0.0%), 78 (0, 0.0%), 79 (0, 0.0%), 80 (0, 0.0%), 81 (0, 0.0%), 82 (0, 0.0%), 83 (0, 0.0%), 84 (0, 0.0%), 85 (0, 0.0%), 86 (0, 0.0%), 87 (0, 0.0%), 88 (1, 1.3%), 89 (0, 0.0%), 90 (0, 0.0%), 91 (0, 0.0%), 92 (0, 0.0%), 93 (0, 0.0%), 94 (1, 1.3%), 95 (0, 0.0%), 96 (0, 0.0%), 97 (0, 0.0%), 98 (0, 0.0%), 99 (0, 0.0%), 100 (0, 0.0%), >100 (0, 0.0%)

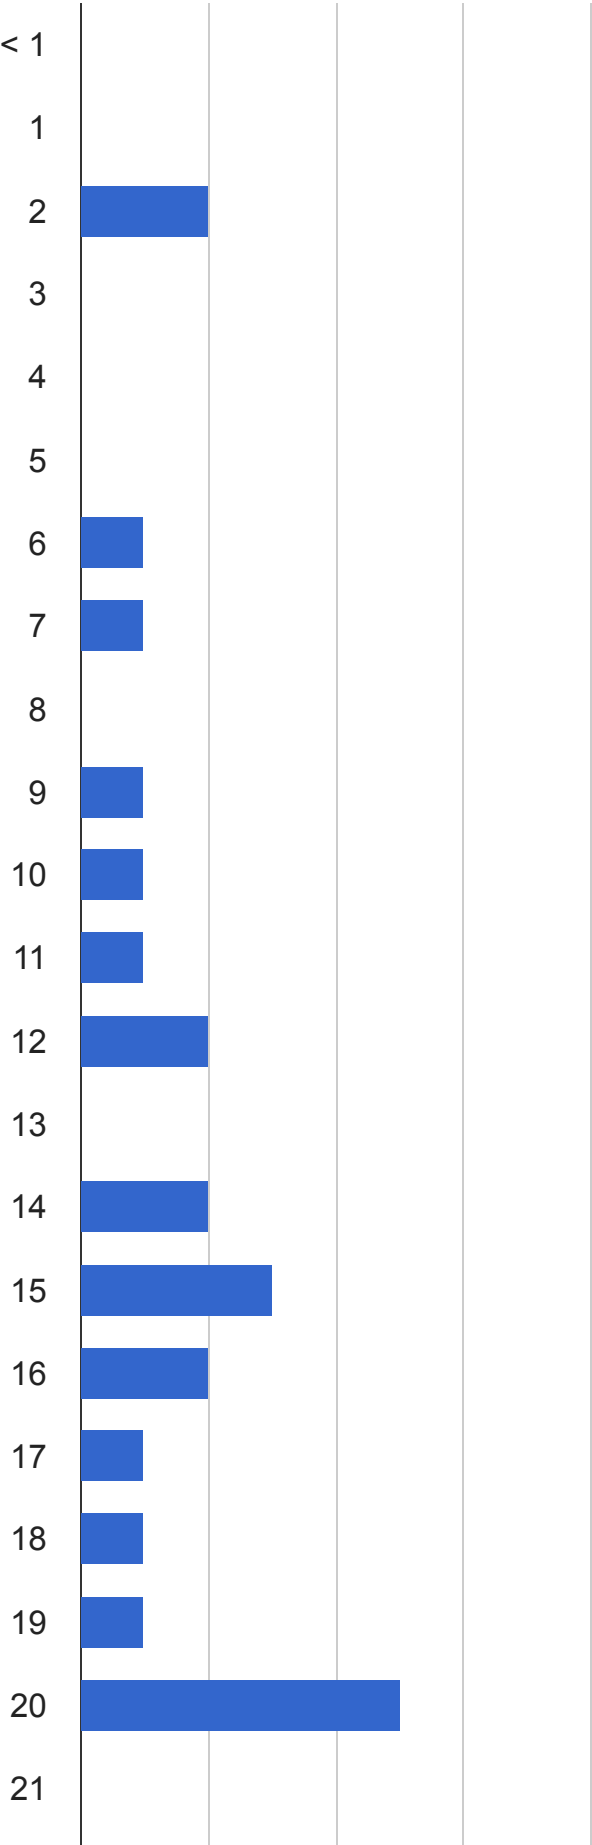

Download image

How many people live in the home? *(home\_how\_many\_live)*

| Total Count (N) | Missing  | Unique |
|-----------------|----------|--------|
| 77              | 1 (1.3%) | 6      |

**Counts/frequency:** 1 (18, 23.4%), 2 (43, 55.8%), 3 (8, 10.4%), 4 (6, 7.8%), 5 (1, 1.3%), 6 (1, 1.3%), 7 (0, 0.0%), 8 (0, 0.0%), 9 (0, 0.0%), 10 (0, 0.0%), 11 (0, 0.0%), 12 (0, 0.0%), 13 (0, 0.0%), 14 (0, 0.0%), 15 (0, 0.0%), >15 (0, 0.0%)

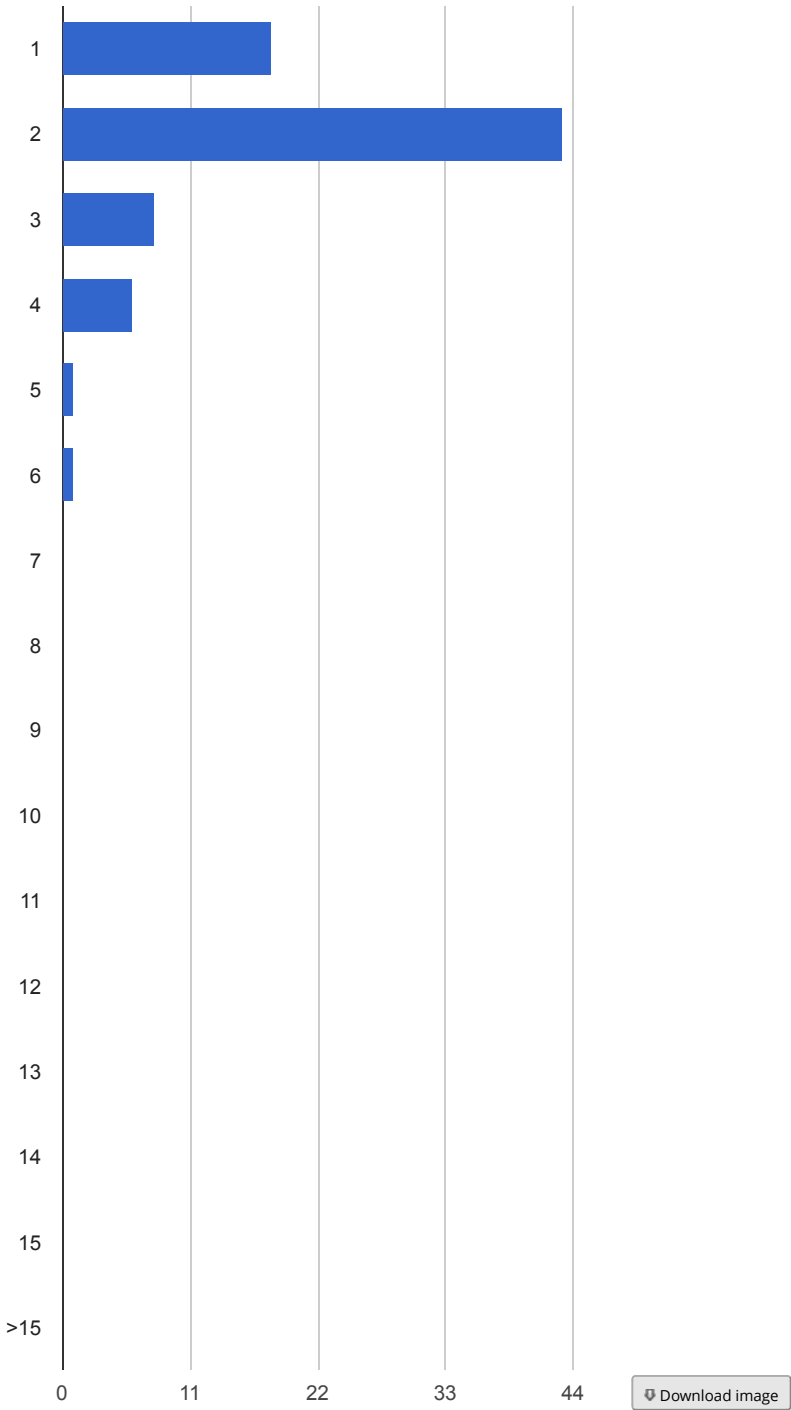

Do you have any pets? *(pets\_y\_n)*

| Total Count (N) | Missing                  | Unique |
|-----------------|--------------------------|--------|
| 77              | <a href="#">1 (1.3%)</a> | 2      |

Counts/frequency: **Yes** (53, 68.8%), **No** (24, 31.2%)

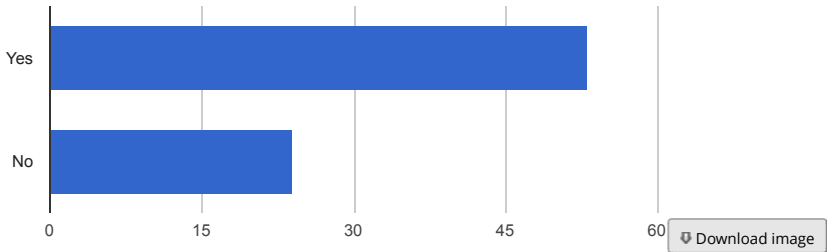

Which type of pet? *(type\_pet)*

| Total Count (N) | Missing                    | Unique |
|-----------------|----------------------------|--------|
| 53              | <a href="#">25 (32.1%)</a> | 3      |

Counts/frequency: **Dog** (40, 75.5%), **Cat** (29, 54.7%), **Other** (14, 26.4%)

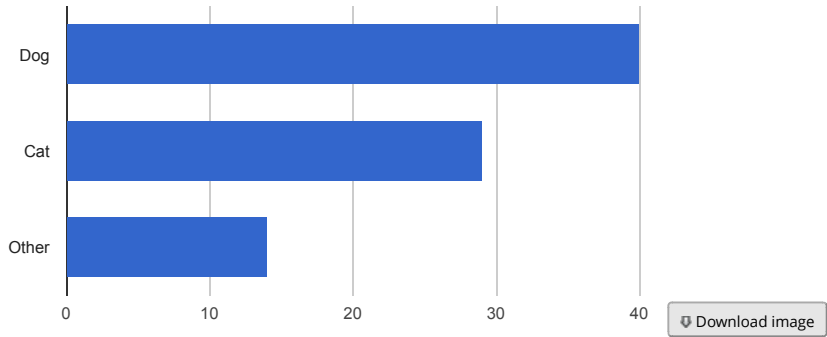

How many dogs? *(dogs\_quantity)*

| Total Count (N) | Missing                    | Unique |
|-----------------|----------------------------|--------|
| 40              | <a href="#">38 (48.7%)</a> | 6      |

Counts/frequency: **1** (20, 50.0%), **2** (12, 30.0%), **3** (2, 5.0%), **4** (4, 10.0%), **5** (0, 0.0%), **6** (1, 2.5%), **7** (0, 0.0%), **8** (1, 2.5%), **9** (0, 0.0%), **10** (0, 0.0%), **>10** (0, 0.0%)

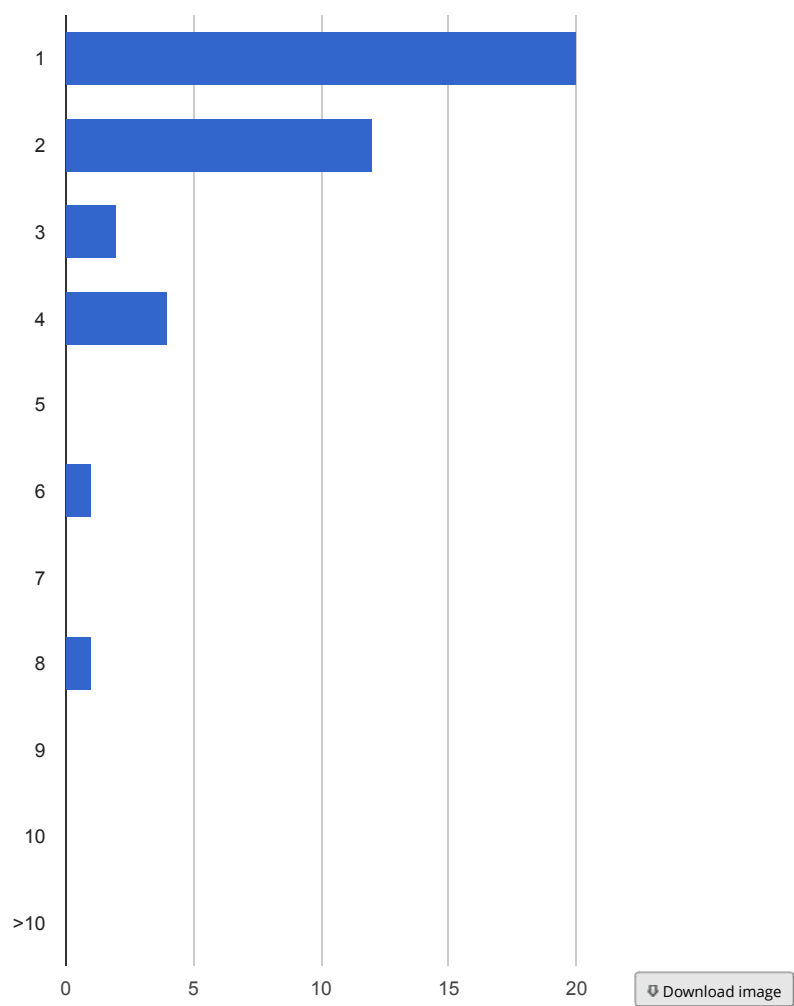

How many cats? (cats\_quantity)

| Total Count (N) | Missing    | Unique |
|-----------------|------------|--------|
| 29              | 49 (62.8%) | 6      |

Counts/frequency: 1 (9, 31.0%), 2 (11, 37.9%), 3 (5, 17.2%), 4 (1, 3.4%), 5 (2, 6.9%), 6 (1, 3.4%), 7 (0, 0.0%), 8 (0, 0.0%), 9 (0, 0.0%), 10 (0, 0.0%), 11 (0, 0.0%), 12 (0, 0.0%), 13 (0, 0.0%), 14 (0, 0.0%), 15 (0, 0.0%), >16 (0, 0.0%)

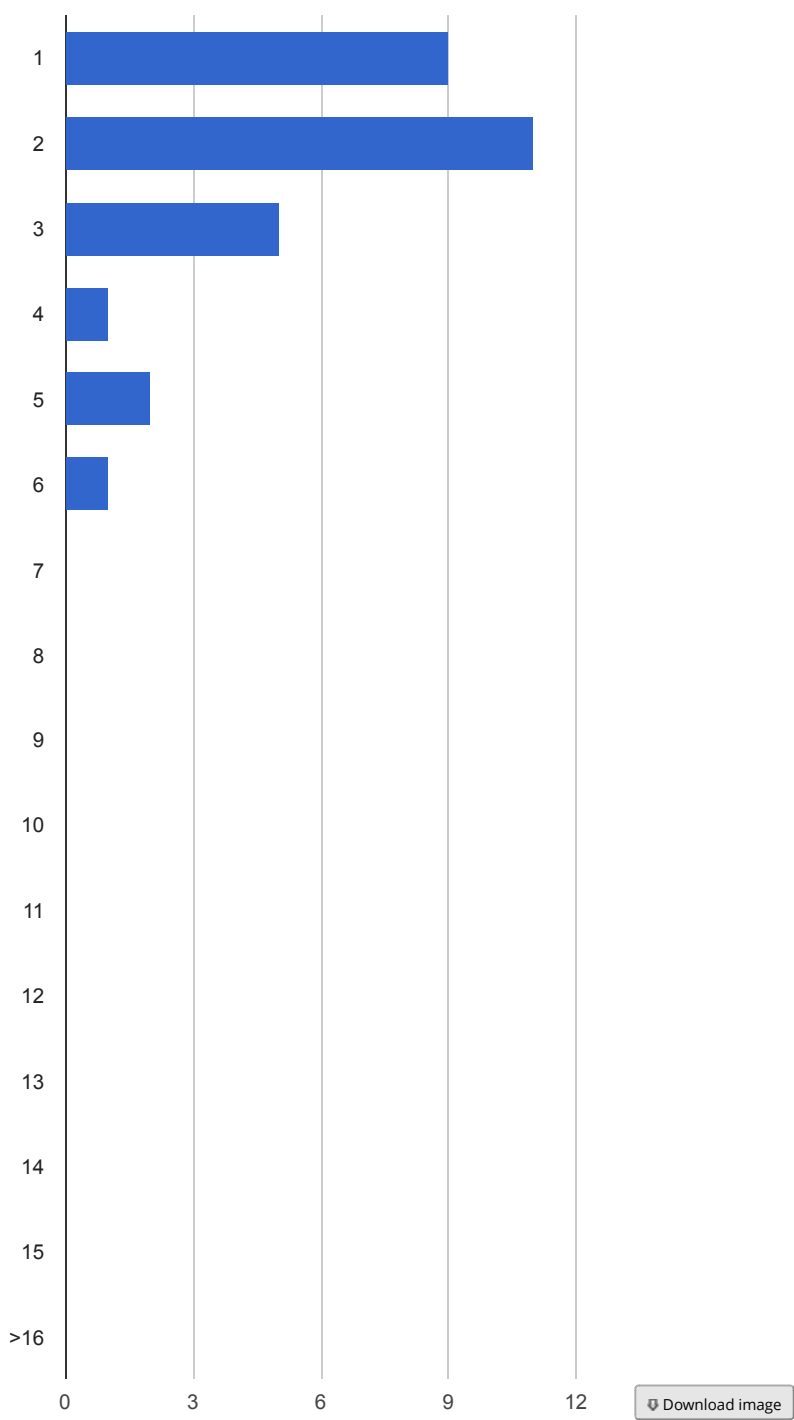

Do the dogs sleep inside or outside? (dogs\_inside\_outside)

| Total Count (N) | Missing    | Unique |
|-----------------|------------|--------|
| 40              | 38 (48.7%) | 2      |

Counts/frequency: Inside (38, 95.0%), Outside (2, 5.0%)



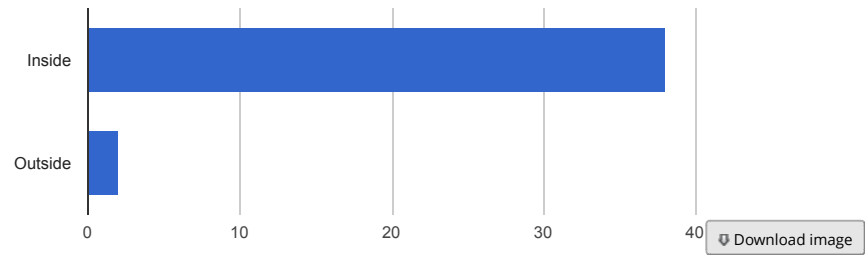

Dogs Notes: (dogs\_notes)

| Total Count (N) | Missing                    |
|-----------------|----------------------------|
| 8               | <a href="#">70 (89.7%)</a> |

Do the cats sleep inside or outside? (cats\_inside\_outside)

| Total Count (N) | Missing                    | Unique |
|-----------------|----------------------------|--------|
| 29              | <a href="#">49 (62.8%)</a> | 2      |

Counts/frequency: Inside (26, 89.7%), Outside (3, 10.3%)

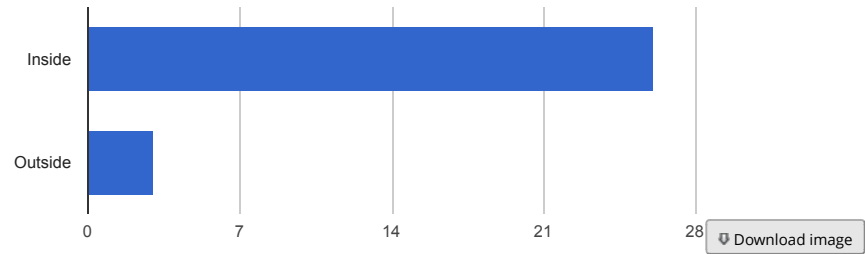

Cats Notes: (cats\_notes)

| Total Count (N) | Missing                    |
|-----------------|----------------------------|
| 11              | <a href="#">67 (85.9%)</a> |

What "other" pets do you have? (other\_pets)

| Total Count (N) | Missing                    |
|-----------------|----------------------------|
| 14              | <a href="#">64 (82.1%)</a> |

Do the "other" pets sleep inside or outside? (other\_pet\_inside\_outside)

| Total Count (N) | Missing                    | Unique |
|-----------------|----------------------------|--------|
| 14              | <a href="#">64 (82.1%)</a> | 2      |

Counts/frequency: **Inside** (8, 57.1%), **Outside** (6, 42.9%)

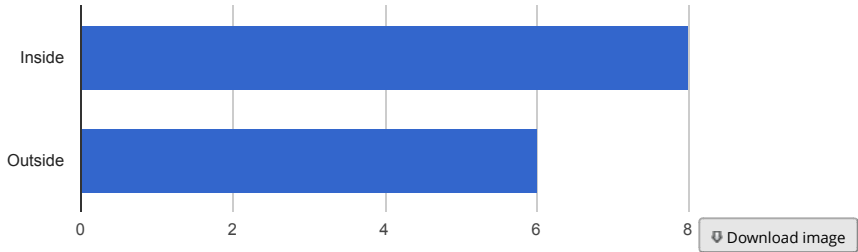

"Other" Pets Notes: *(other\_pets\_notes)*

| Total Count (N) | Missing                    |
|-----------------|----------------------------|
| 1               | <a href="#">77 (98.7%)</a> |

Do you have any livestock? *(livestock\_y\_n)*

| Total Count (N) | Missing                  | Unique |
|-----------------|--------------------------|--------|
| 77              | <a href="#">1 (1.3%)</a> | 2      |

Counts/frequency: **Yes** (17, 22.1%), **No** (60, 77.9%)

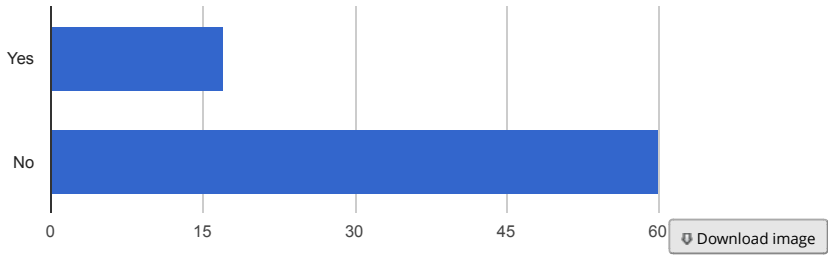

What type of livestock do you have? *(livestock\_type)*

| Total Count (N) | Missing                    | Unique |
|-----------------|----------------------------|--------|
| 17              | <a href="#">61 (78.2%)</a> | 5      |

Counts/frequency: **Cattle** (3, 17.6%), **Horses** (9, 52.9%), **Goats/Sheep** (2, 11.8%), **Chickens** (7, 41.2%), **Pigs** (0, 0.0%), **Turkey** (0, 0.0%), **Llama** (0, 0.0%), **Other** (1, 5.9%)

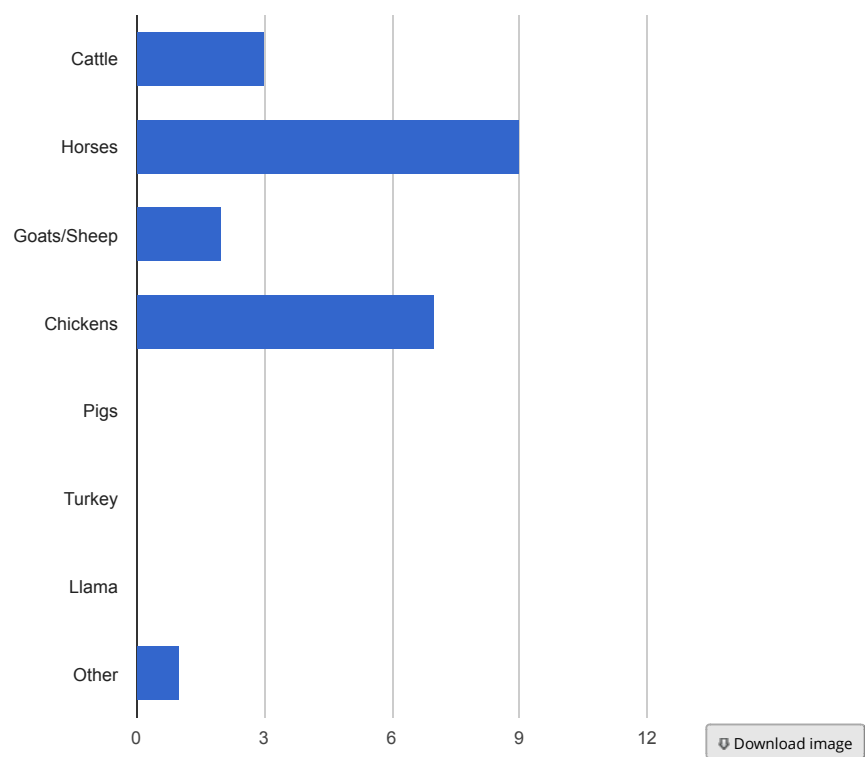

How many cattle? *(cattle\_quantity)*

| Total Count (N) | Missing    | Unique |
|-----------------|------------|--------|
| 3               | 75 (96.2%) | 1      |

Counts/frequency: 1 (0, 0.0%), 2 (0, 0.0%), 3 (0, 0.0%), 4 (0, 0.0%), 5 (0, 0.0%), 6 (0, 0.0%), 7 (0, 0.0%), 8 (0, 0.0%), 9 (0, 0.0%), 10 (0, 0.0%), 11 (0, 0.0%), 12 (0, 0.0%), 13 (0, 0.0%), 14 (0, 0.0%), 15 (0, 0.0%), >15 (3, 100.0%)

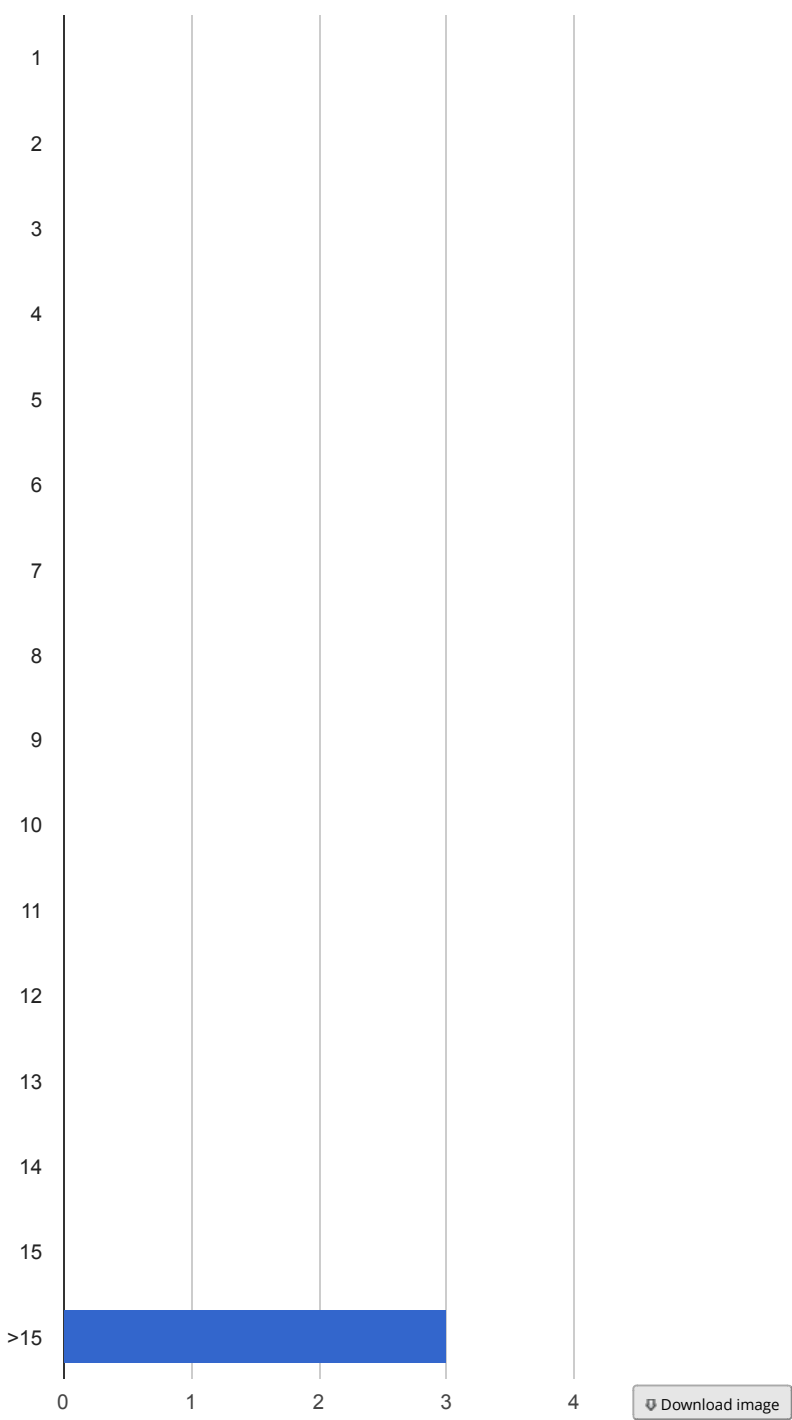

How many Horses? (horses\_quantity)

| Total Count (N) | Missing    | Unique |
|-----------------|------------|--------|
| 8               | 70 (89.7%) | 5      |

Counts/frequency: 1 (1, 12.5%), 2 (4, 50.0%), 3 (0, 0.0%), 4 (1, 12.5%), 5 (0, 0.0%), 6 (0, 0.0%), 7 (0, 0.0%), 8 (0, 0.0%), 9 (0, 0.0%), 10 (0, 0.0%), 11 (0, 0.0%), 12 (0, 0.0%), 13 (0, 0.0%), 14 (0, 0.0%), 15 (1, 12.5%), >15 (1, 12.5%)

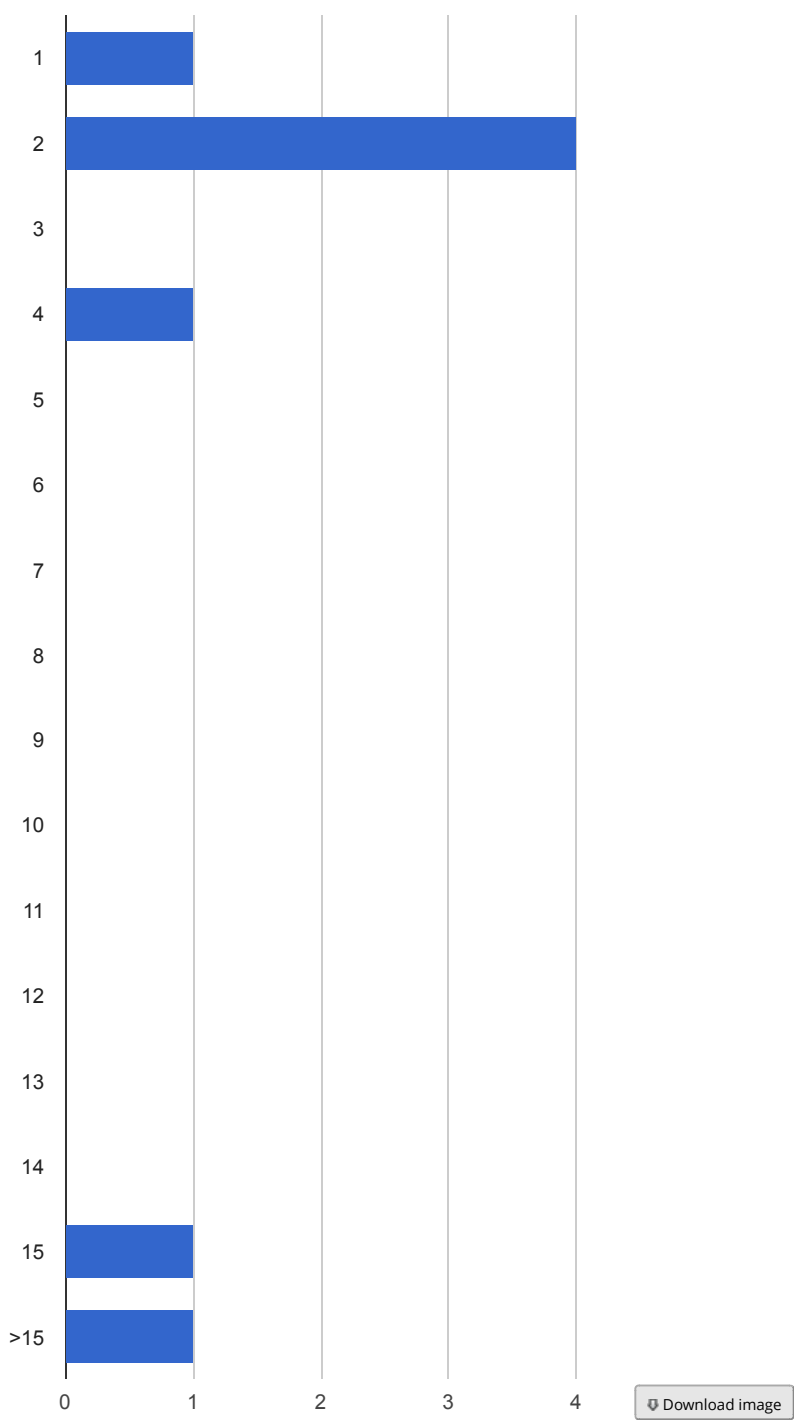

How many goats/sheep? (goats\_sheep\_quantity)

| Total Count (N) | Missing    | Unique |
|-----------------|------------|--------|
| 2               | 76 (97.4%) | 2      |

Counts/frequency: 1 (0, 0.0%), 2 (1, 50.0%), 3 (0, 0.0%), 4 (0, 0.0%), 5 (1, 50.0%), 6 (0, 0.0%), 7 (0, 0.0%), 8 (0, 0.0%), 9 (0, 0.0%), 10 (0, 0.0%), 11 (0, 0.0%), 12 (0, 0.0%), 13 (0, 0.0%), 14 (0, 0.0%), 15 (0, 0.0%), >15 (0, 0.0%)

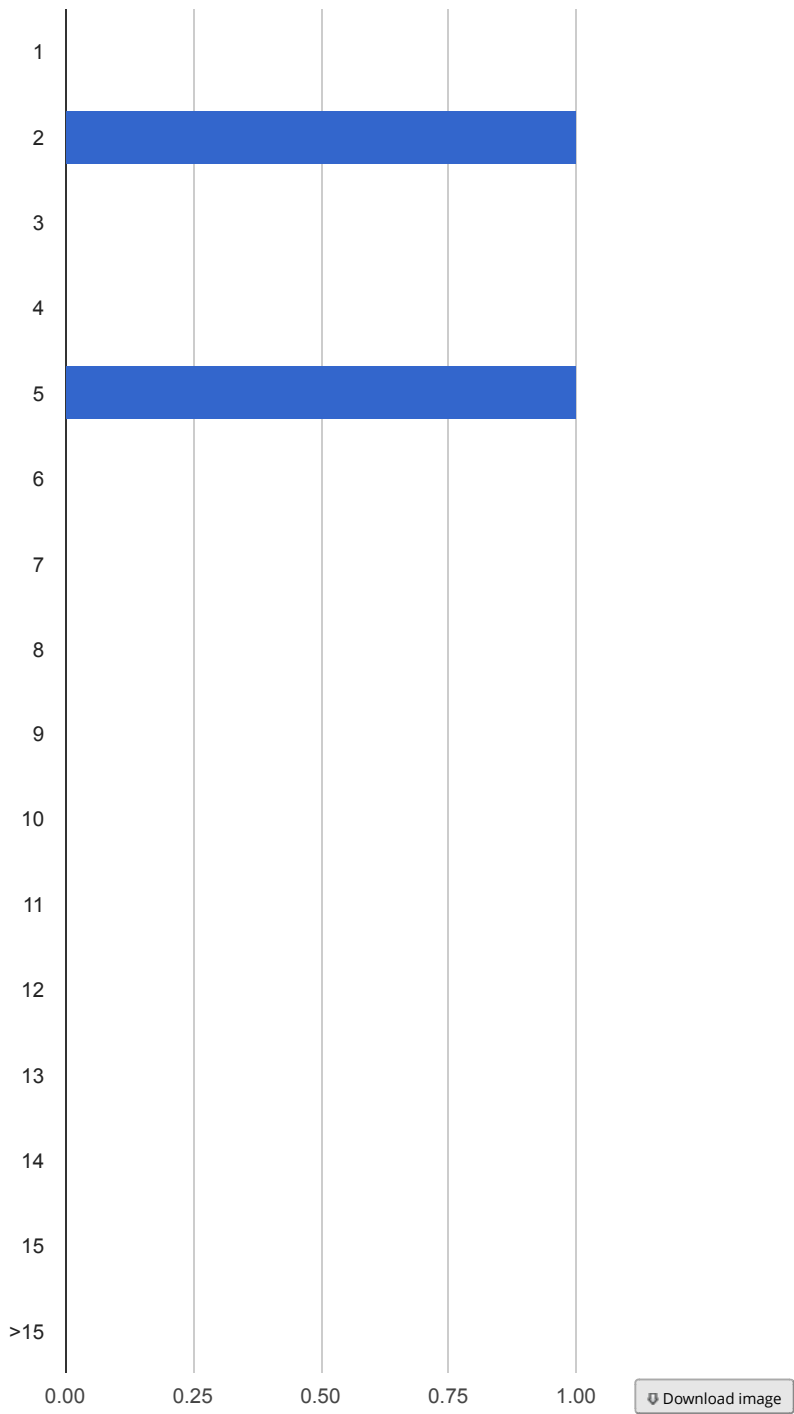

How many chickens? (chickens\_quantity)

| Total Count (N) | Missing    | Unique |
|-----------------|------------|--------|
| 6               | 72 (92.3%) | 5      |

Counts/frequency: 1 (0, 0.0%), 2 (2, 33.3%), 3 (1, 16.7%), 4 (1, 16.7%), 5 (0, 0.0%), 6 (1, 16.7%), 7 (0, 0.0%), 8 (0, 0.0%), 9 (0, 0.0%), 10 (1, 16.7%), 11 (0, 0.0%), 12 (0, 0.0%), 13 (0, 0.0%), 14 (0, 0.0%), 15 (0, 0.0%), >15 (0, 0.0%)

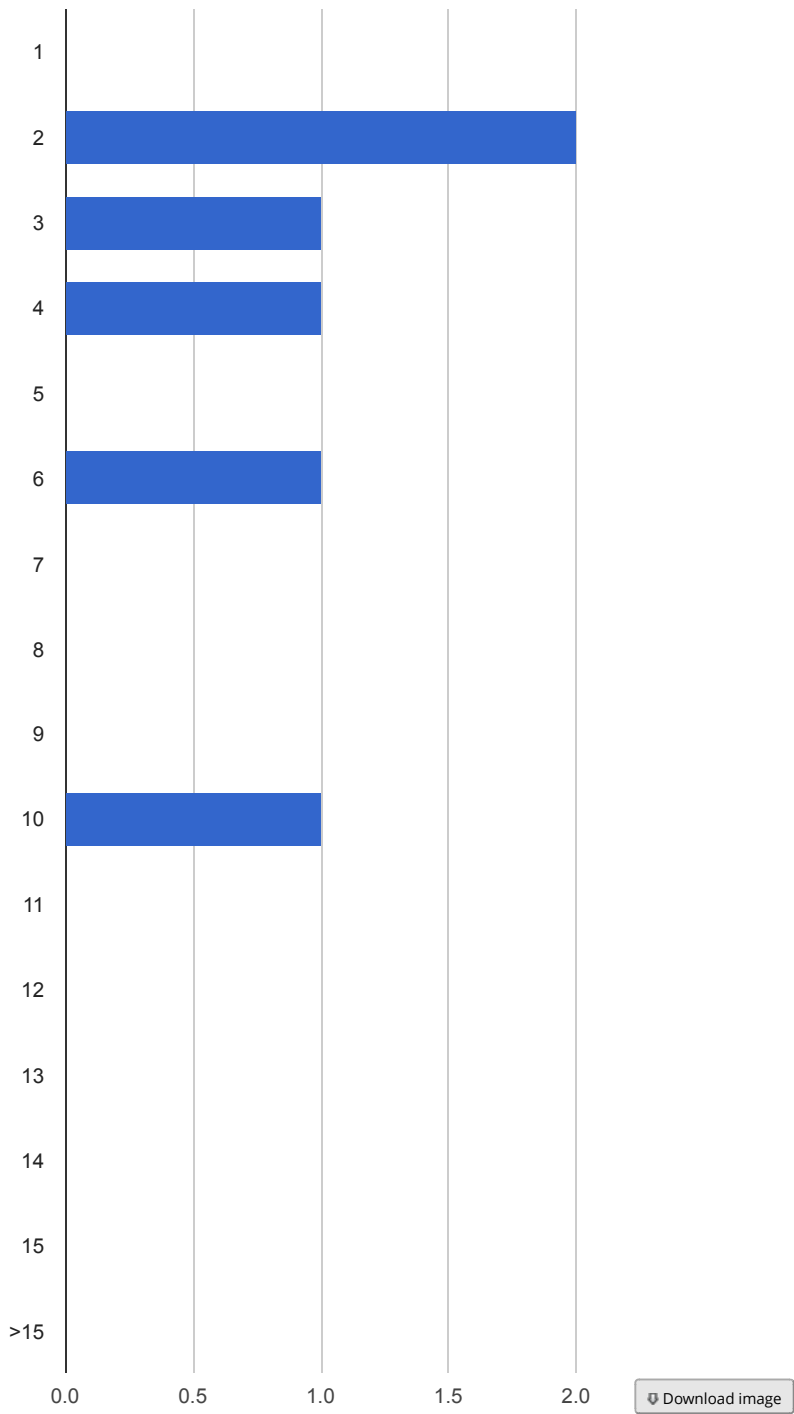

How many pigs? *(pigs\_quantity)*

| Total Count (N) | Missing     |
|-----------------|-------------|
| 0               | 78 (100.0%) |

How many turkeys? *(turkey\_quantity)*

| Total Count (N) | Missing |
|-----------------|---------|
|                 |         |

|   |                             |
|---|-----------------------------|
| 0 | <a href="#">78 (100.0%)</a> |
|---|-----------------------------|

How many llamas? *(llama\_quantity)*

| Total Count (N) | Missing                     |
|-----------------|-----------------------------|
| 0               | <a href="#">78 (100.0%)</a> |

What "other" livestock? *(livestock\_other)*

| Total Count (N) | Missing                    |
|-----------------|----------------------------|
| 1               | <a href="#">77 (98.7%)</a> |

How many of this "other" livestock? *(livestock\_other\_quant)*

| Total Count (N) | Missing                     |
|-----------------|-----------------------------|
| 0               | <a href="#">78 (100.0%)</a> |

Within the last month have you seen wild, stray animals, or rodents in your house, attic or under your house? *(wild\_stray\_rodents\_y\_n)*

| Total Count (N) | Missing                  | Unique |
|-----------------|--------------------------|--------|
| 77              | <a href="#">1 (1.3%)</a> | 2      |

Counts/frequency: Yes (21, 27.3%), No (56, 72.7%)

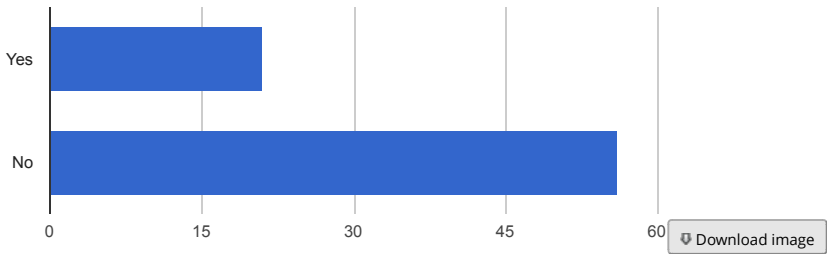

Do you have air conditioning? *(air\_conditioning\_y\_n)*

| Total Count (N) | Missing                  | Unique |
|-----------------|--------------------------|--------|
| 77              | <a href="#">1 (1.3%)</a> | 2      |

Counts/frequency: Yes (64, 83.1%), No (13, 16.9%)



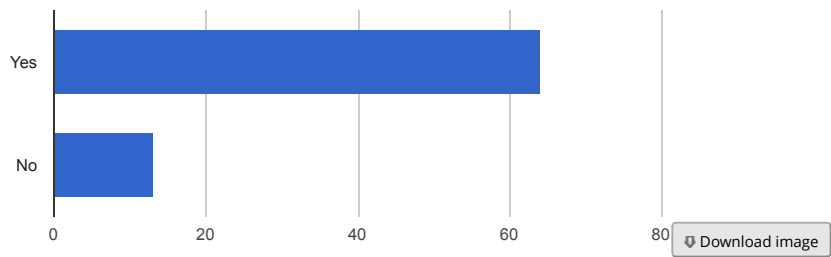

**During the last month, how often did you use the air-conditioning at night?** *(air\_conditioning\_how\_often)*

| Total Count (N) | Missing   | Unique |
|-----------------|-----------|--------|
| 69              | 9 (11.5%) | 3      |

Counts/frequency: 4 or more nights/week (52, 75.4%), 3 or fewer nights/week (4, 5.8%), Never (13, 18.8%)

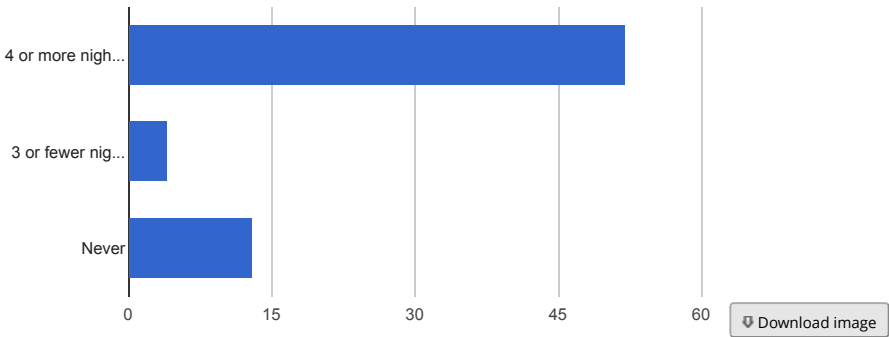

**Air conditioning: Additional Notes** *(air\_conditioning\_notes)*

| Total Count (N) | Missing    |
|-----------------|------------|
| 22              | 56 (71.8%) |

**Do you have screen on your windows?** *(screens\_windows\_y\_n)*

| Total Count (N) | Missing  | Unique |
|-----------------|----------|--------|
| 77              | 1 (1.3%) | 2      |

Counts/frequency: Yes (75, 97.4%), No (2, 2.6%)

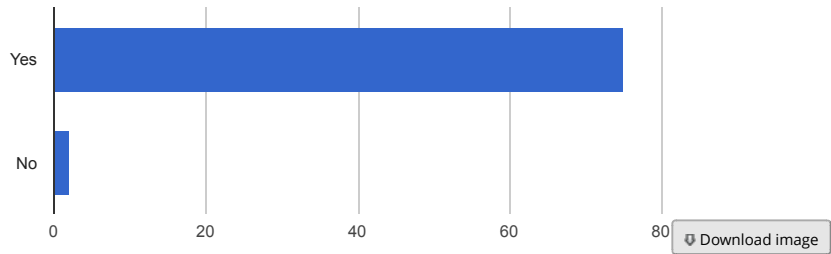

**During the last month, how often do you leave windows open?** *(windows\_open\_how\_often)*

| Total Count (N) | Missing  | Unique |
|-----------------|----------|--------|
| 76              | 2 (2.6%) | 3      |

Counts/frequency: 4 or more nights/week (30, 39.5%), 3 or fewer nights/week (10, 13.2%), Never (36, 47.4%)

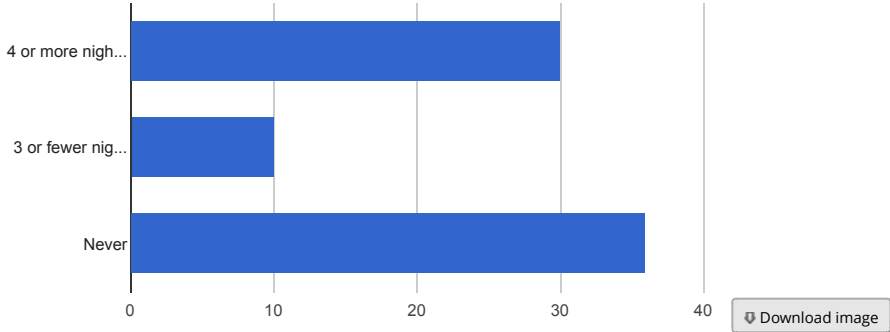

Doors/Windows screens: Additional notes (screens\_notes)

| Total Count (N) | Missing    |
|-----------------|------------|
| 18              | 60 (76.9%) |

Do you apply any pesticides INSIDE your home? (pesticides\_inside\_y\_n)

| Total Count (N) | Missing  | Unique |
|-----------------|----------|--------|
| 77              | 1 (1.3%) | 2      |

Counts/frequency: Yes (26, 33.8%), No (51, 66.2%)

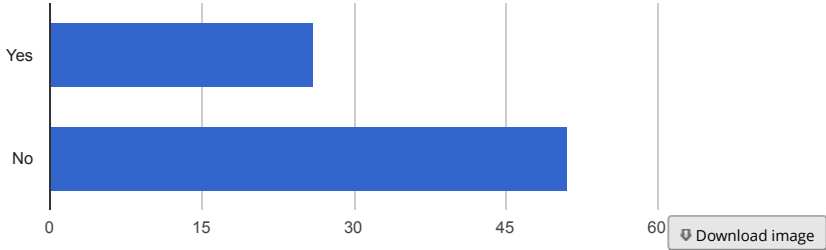

Do you apply any pesticides OUTSIDE your home? (pesticides\_outside\_y\_n)

| Total Count (N) | Missing  | Unique |
|-----------------|----------|--------|
| 77              | 1 (1.3%) | 2      |

Counts/frequency: Yes (33, 42.9%), No (44, 57.1%)

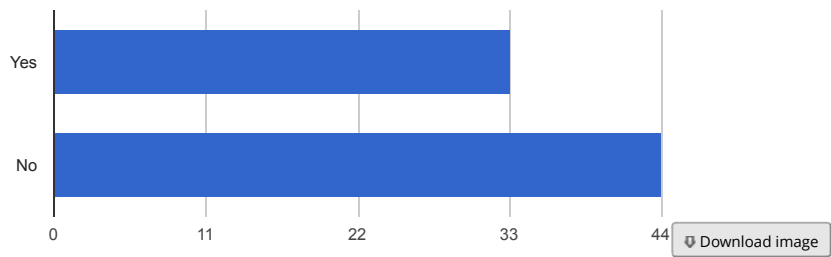

Pesticides: Additional notes (pesticides\_notes)

| Total Count (N) | Missing                    |
|-----------------|----------------------------|
| 32              | <a href="#">46 (59.0%)</a> |

Do you have a professional pest control service? (pest\_control\_y\_n)

| Total Count (N) | Missing                  | Unique |
|-----------------|--------------------------|--------|
| 77              | <a href="#">1 (1.3%)</a> | 2      |

Counts/frequency: Yes (15, 19.5%), No (62, 80.5%)

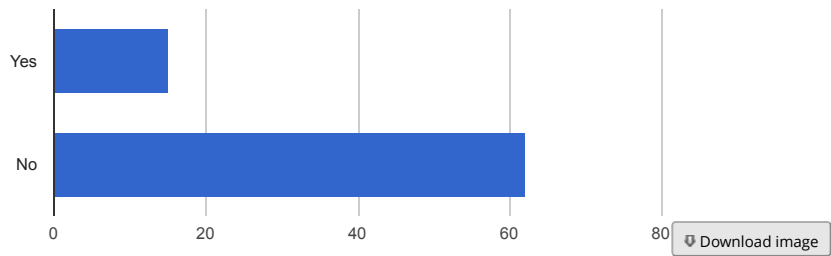

Do they spray inside, outside, or both? (pest\_control\_location)

| Total Count (N) | Missing                    | Unique |
|-----------------|----------------------------|--------|
| 16              | <a href="#">62 (79.5%)</a> | 2      |

Counts/frequency: Inside (0, 0.0%), Outside (5, 31.3%), Both (11, 68.8%)

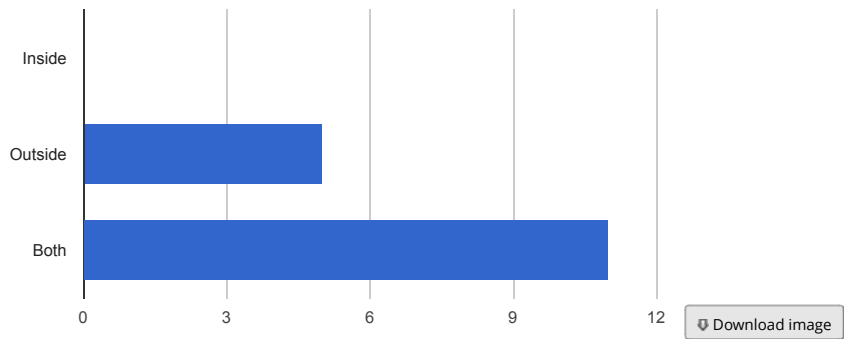

What is the name of the pest control company? (pest\_control\_company)

| Total Count (N) | Missing                    |
|-----------------|----------------------------|
| 15              | <a href="#">63 (80.8%)</a> |

Have you seen this insect? (participant acknowledges seeing a kissing bug before) *(seen\_kissing\_bug\_y\_n)*

| Total Count (N) | Missing                  | Unique |
|-----------------|--------------------------|--------|
| 77              | <a href="#">1 (1.3%)</a> | 2      |

Counts/frequency: **Yes** (74, 96.1%), **No** (3, 3.9%)

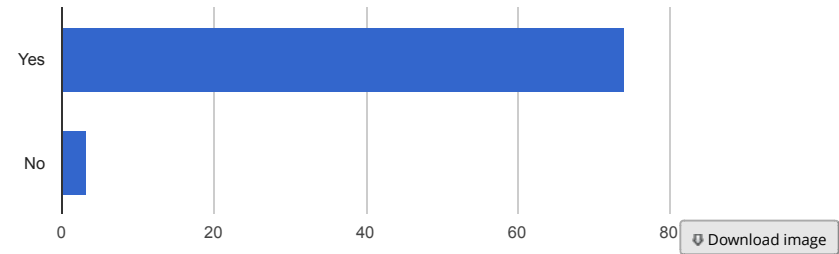

Where have you seen this insect (kissing bug)? *(seen\_kissing\_bug\_location)*

| Total Count (N) | Missing                  | Unique |
|-----------------|--------------------------|--------|
| 75              | <a href="#">3 (3.8%)</a> | 3      |

Counts/frequency: **Inside** (32, 42.7%), **Outside** (1, 1.3%), **Both** (42, 56.0%)

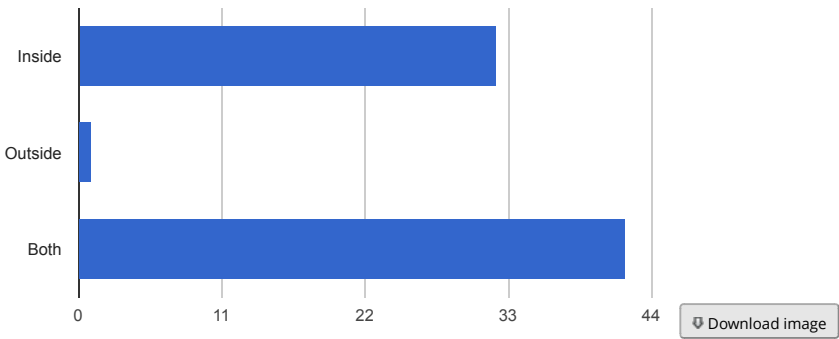

If inside your house, where have you seen it? *(inside\_where)*

| Total Count (N) | Missing                   |
|-----------------|---------------------------|
| 69              | <a href="#">9 (11.5%)</a> |

If outside your house, where have you seen it? *(outside\_where)*

| Total Count (N) | Missing |
|-----------------|---------|
|                 |         |

|    |                            |
|----|----------------------------|
| 57 | <a href="#">21 (26.9%)</a> |
|----|----------------------------|

When did you last see this bug? (if participant only put a "date" please estimate approximately how many days or weeks or years from day survey was completed) *(last\_seen\_kissing\_bug)*

| Total Count (N) | Missing                  |
|-----------------|--------------------------|
| 76              | <a href="#">2 (2.6%)</a> |

Is this house a primary house or secondary structure? *(home\_primary\_secondary)*

| Total Count (N) | Missing                  | Unique |
|-----------------|--------------------------|--------|
| 76              | <a href="#">2 (2.6%)</a> | 2      |

Counts/frequency: Primary (75, 98.7%), Secondary (1, 1.3%)

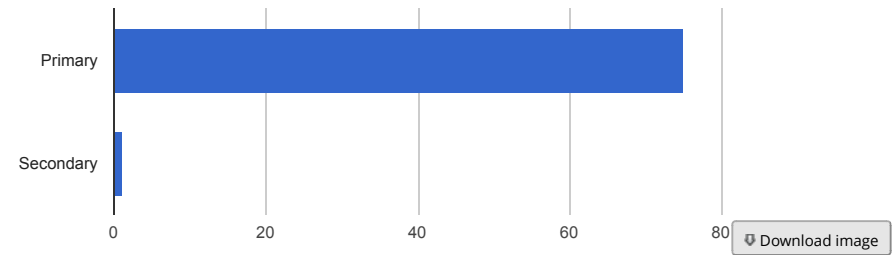

Is this house: (check all that apply) *(home\_building\_materials)*

| Total Count (N) | Missing                  | Unique |
|-----------------|--------------------------|--------|
| 75              | <a href="#">3 (3.8%)</a> | 4      |

Counts/frequency: Raised (14, 18.7%), Concrete foundation (62, 82.7%), Brick (24, 32.0%), Siding (5, 6.7%)

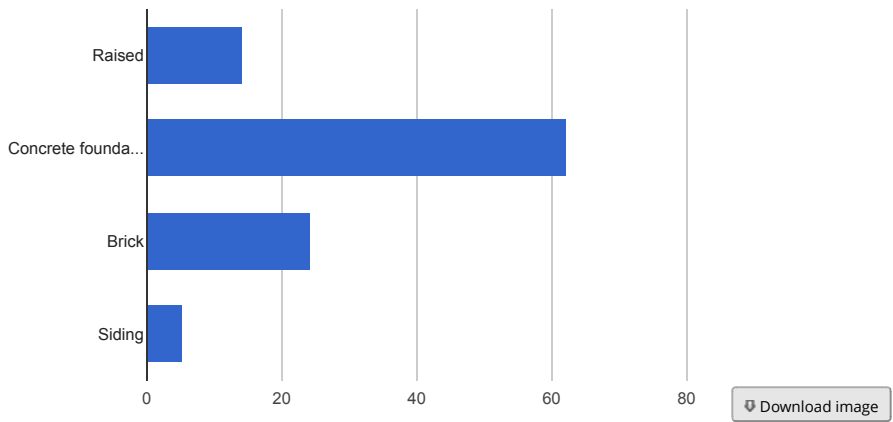

Assess structural integrity of Residence: 3 (good or great condition) 2 (decent condition) 1 (poor condition) *(home\_condition\_1\_3)*

| Total Count (N) | Missing                  | Unique |
|-----------------|--------------------------|--------|
| 74              | <a href="#">4 (5.1%)</a> | 3      |

Counts/frequency: 3 (48, 64.9%), 2 (24, 32.4%), 1 (2, 2.7%)

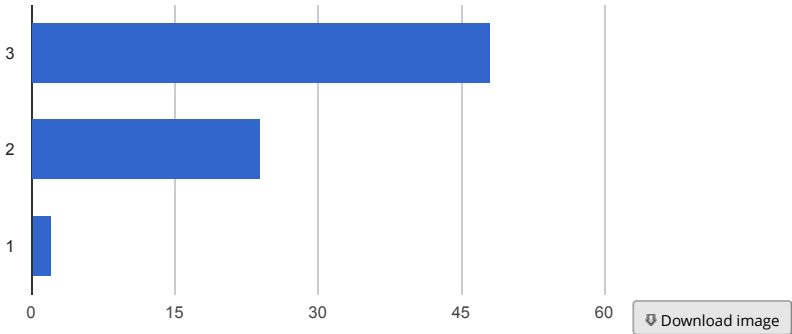

What type of material is the roof made of? (*home\_roof\_material*)

| Total Count (N) | Missing                  | Unique |
|-----------------|--------------------------|--------|
| 76              | <a href="#">2 (2.6%)</a> | 4      |

Counts/frequency: Creosote tile/shingle (13, 17.1%), Ceramic tile (9, 11.8%), Metal (19, 25.0%), Other (40, 52.6%)

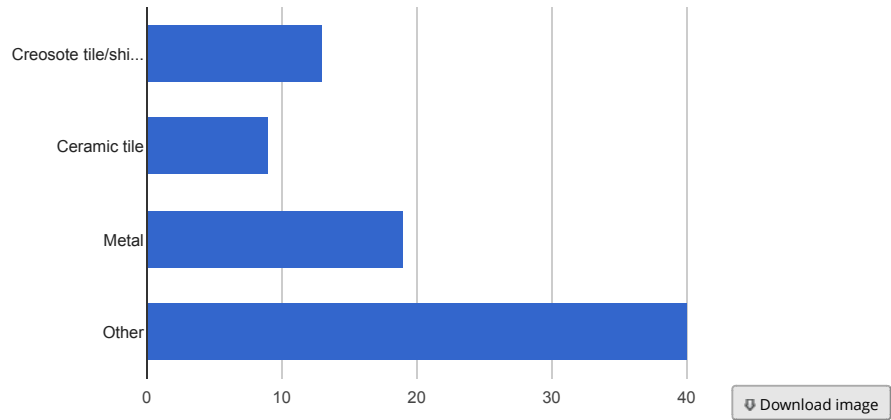

What "other" type of roofing material? (*home\_roof\_other*)

| Total Count (N) | Missing                    |
|-----------------|----------------------------|
| 37              | <a href="#">41 (52.6%)</a> |

From the perimeter of the house, does there appear to be holes or burrows under the house? (*burrows\_house\_y\_n*)

| Total Count (N) | Missing                  | Unique |
|-----------------|--------------------------|--------|
| 77              | <a href="#">1 (1.3%)</a> | 2      |

Counts/frequency: **Yes** (26, 33.8%), **No** (51, 66.2%)

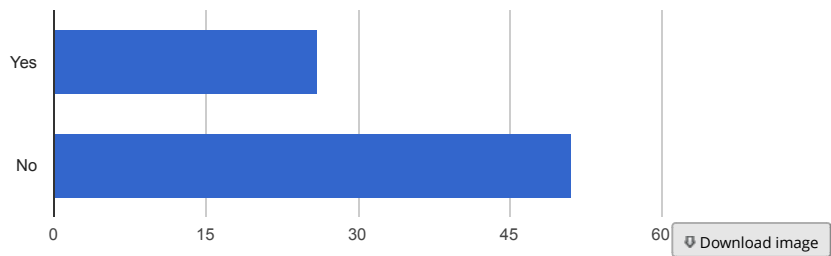

Does the home have screens on its doors? *(home\_doors\_screens\_y\_n)*

| Total Count (N) | Missing  | Unique |
|-----------------|----------|--------|
| 76              | 2 (2.6%) | 2      |

Counts/frequency: **Yes** (47, 61.8%), **No** (29, 38.2%)

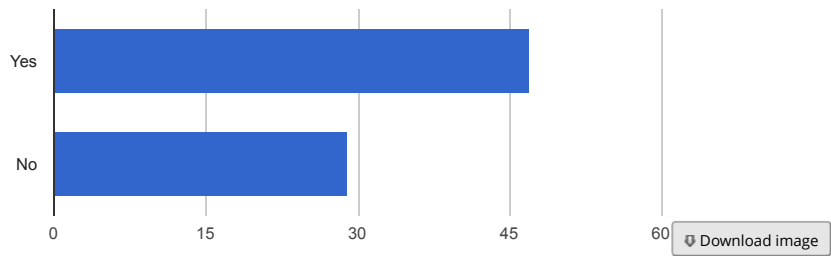

if "yes", the present condition of the door screens appear to be: (check only one) *(home\_doors\_screens\_cond)*

| Total Count (N) | Missing    | Unique |
|-----------------|------------|--------|
| 46              | 32 (41.0%) | 3      |

Counts/frequency: **All screens intact (no holes)** (34, 73.9%), **Some screens have holes** (11, 23.9%), **Many screens have holes** (1, 2.2%)

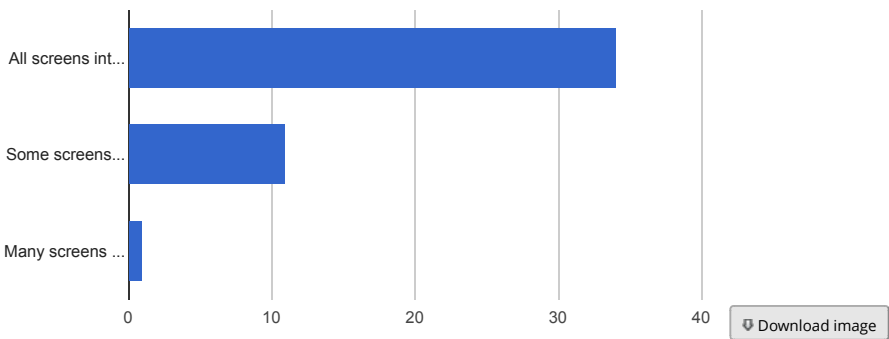

How many doors have screens? *(home\_doors\_screens\_quant\_y)*

| Total Count (N) | Missing    | Unique |
|-----------------|------------|--------|
| 68              | 10 (12.8%) | 9      |

**Counts/frequency:** 0 (21, 30.9%), 1 (11, 16.2%), 2 (19, 27.9%), 3 (8, 11.8%), 4 (3, 4.4%), 5 (2, 2.9%), 6 (0, 0.0%), 7 (1, 1.5%), 8 (2, 2.9%), 9 (0, 0.0%), 10 (0, 0.0%), 11 (0, 0.0%), 12 (0, 0.0%), 13 (1, 1.5%), 14 (0, 0.0%), 15 (0, 0.0%), >15 (0, 0.0%)

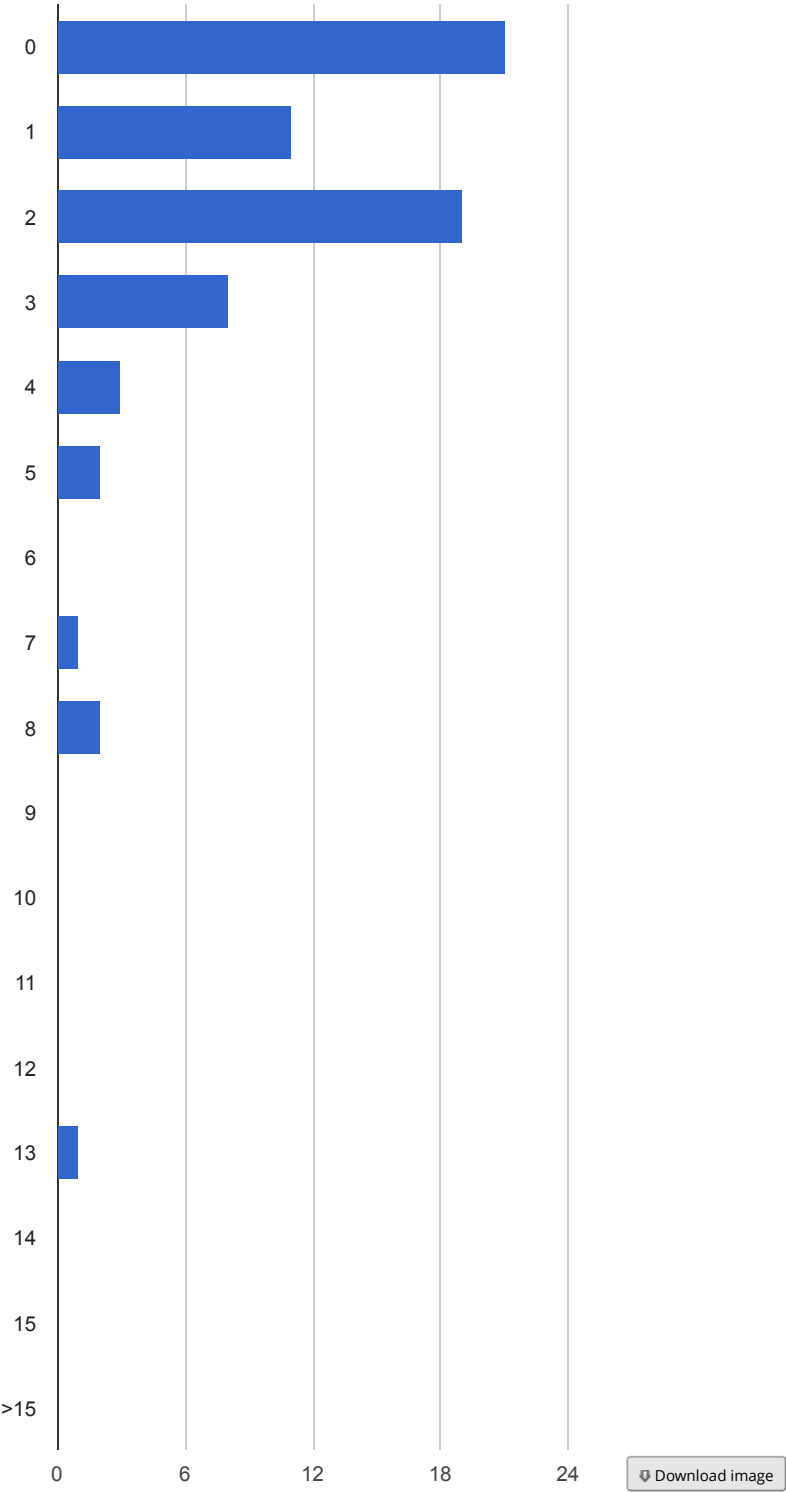

How many doors do not have screens? (home\_doors\_screen\_n)

| Total Count (N) | Missing    | Unique |
|-----------------|------------|--------|
| 60              | 18 (23.1%) | 8      |



**Counts/frequency:** 0 (18, 30.0%), 1 (9, 15.0%), 2 (17, 28.3%), 3 (7, 11.7%), 4 (5, 8.3%), 5 (2, 3.3%), 6 (0, 0.0%), 7 (1, 1.7%), 8 (0, 0.0%), 9 (1, 1.7%), 10 (0, 0.0%), 11 (0, 0.0%), 12 (0, 0.0%), 13 (0, 0.0%), 14 (0, 0.0%), 15 (0, 0.0%), >15 (0, 0.0%)

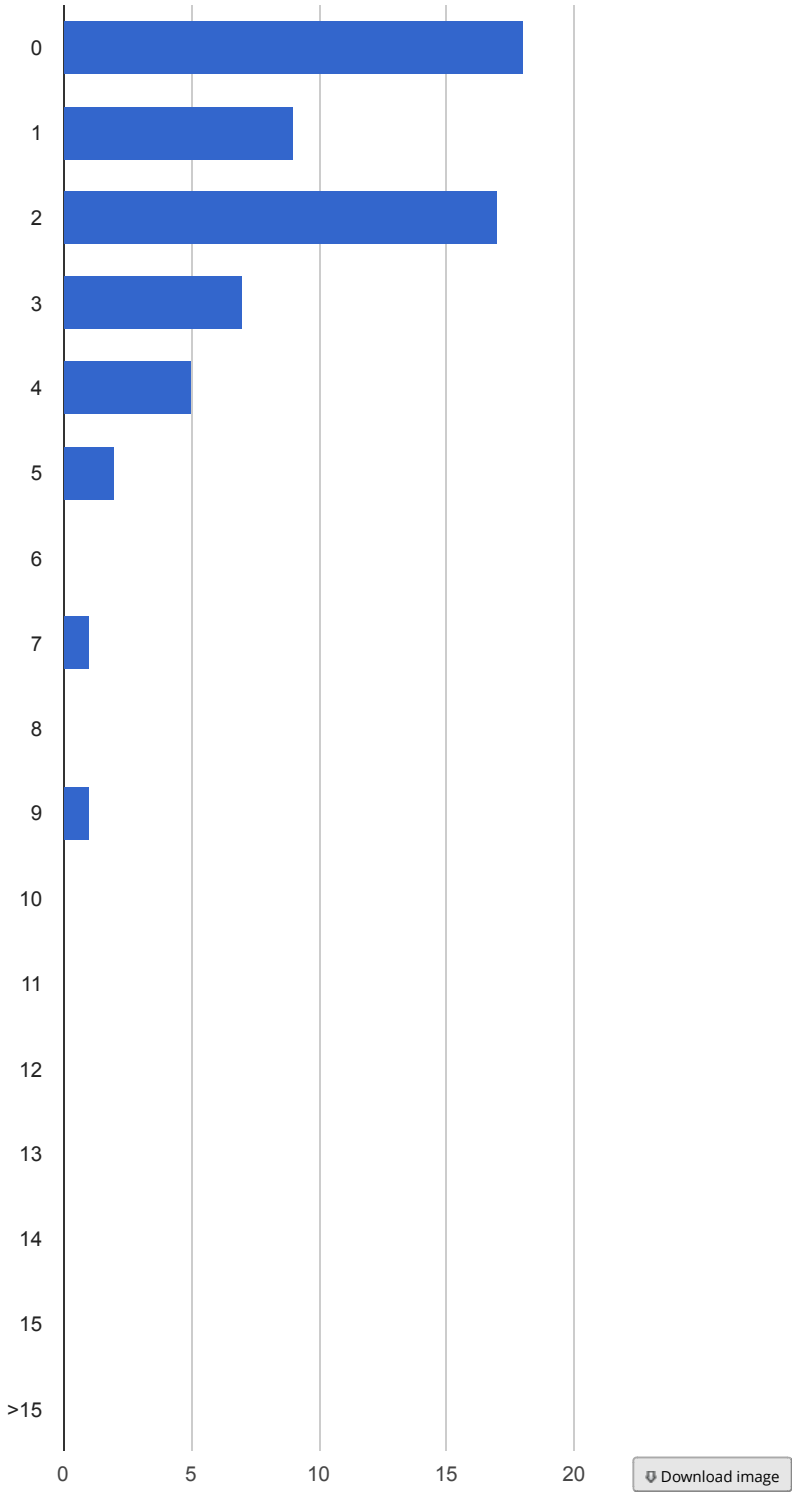

**Household Attributes Additional Notes:** *(home\_additional\_notes)*

| Total Count (N) | Missing                    |
|-----------------|----------------------------|
| 16              | <a href="#">62 (79.5%)</a> |

What number of outbuildings are on the property? *(outbuildings\_quantity)*

| Total<br>Count<br>(N) | Missing                  | Unique |
|-----------------------|--------------------------|--------|
| 76                    | <a href="#">2 (2.6%)</a> | 9      |

**Counts/frequency:** 0 (18, 23.7%), 1 (28, 36.8%), 2 (13, 17.1%), 3 (8, 10.5%), 4 (3, 3.9%), 5 (3, 3.9%), 6 (1, 1.3%), 7 (0, 0.0%), 8 (1, 1.3%), 9 (1, 1.3%), 10 (0, 0.0%), 11 (0, 0.0%), 12 (0, 0.0%), 13 (0, 0.0%), 14 (0, 0.0%), 15 (0, 0.0%), >15 (0, 0.0%)

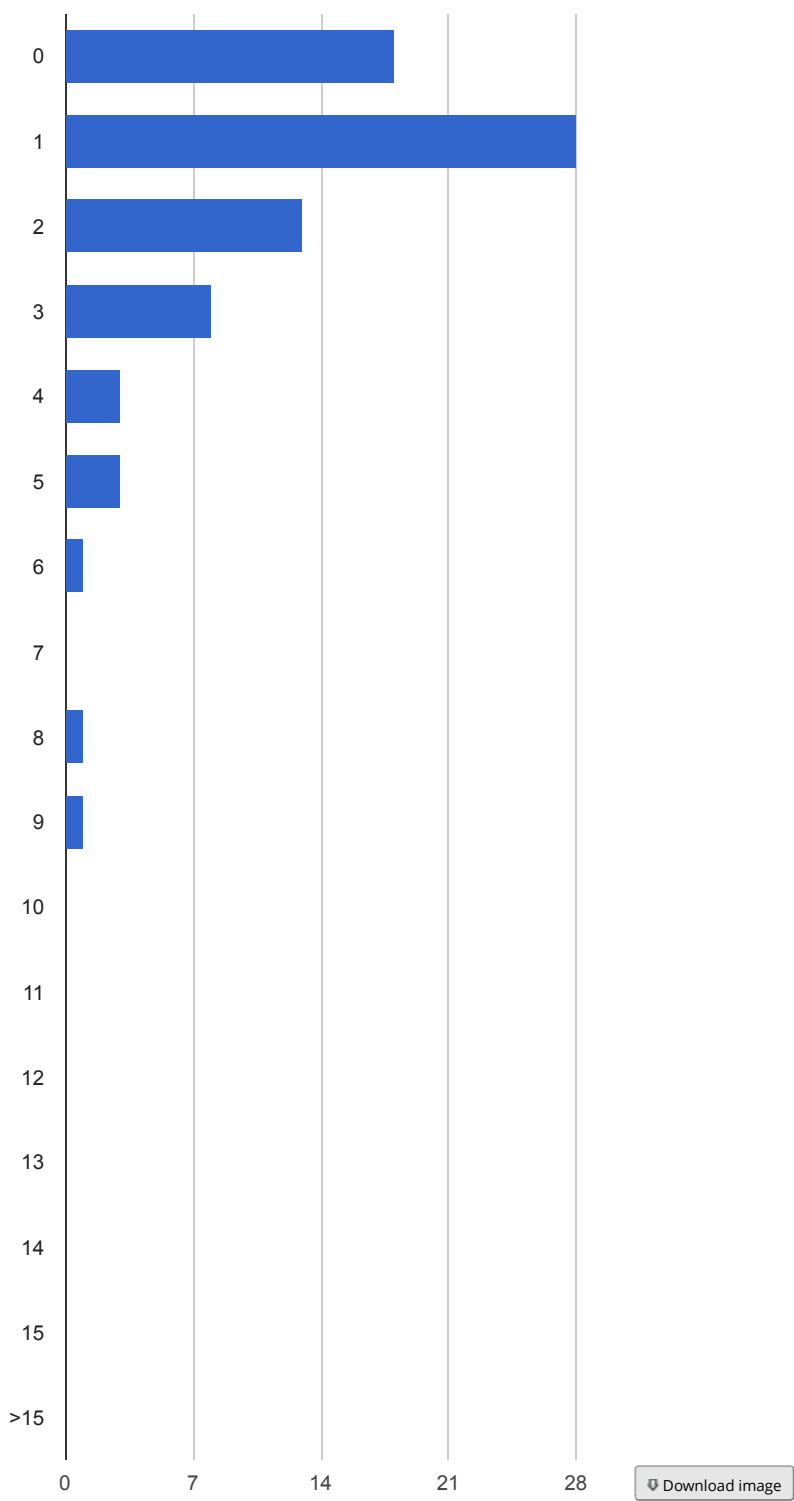

What type are these outbuildings? (check all that apply) (outbuildings\_types)

| Total Count (N) | Missing   | Unique |
|-----------------|-----------|--------|
| 70              | 8 (10.3%) | 5      |

Counts/frequency: **Garage** (14, 20.0%), **Storage shed** (37, 52.9%), **Barn** (13, 18.6%), **Trailer** (8, 11.4%), **Other** (33, 47.1%)

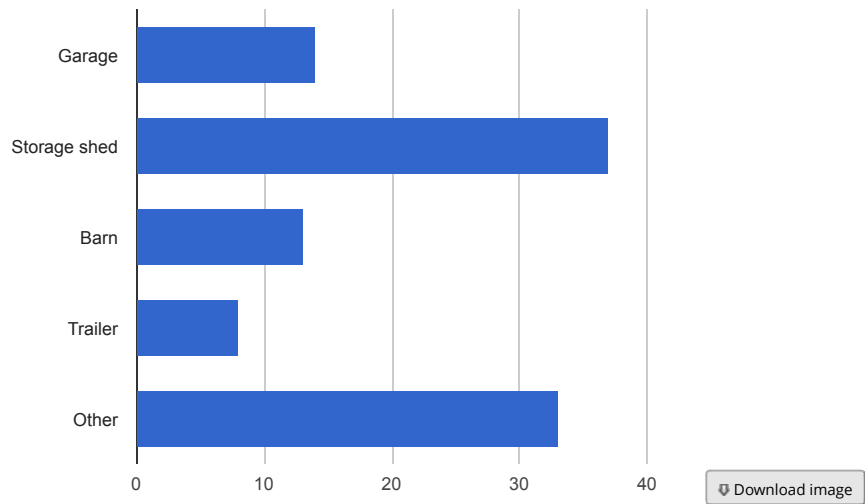

What "other" type of outbuilding? *(outbuilding\_type\_other)*

| Total Count (N) | Missing                    |
|-----------------|----------------------------|
| 30              | <a href="#">48 (61.5%)</a> |

Outbuildings Additional Notes: *(outbuildings\_add\_notes)*

| Total Count (N) | Missing                    |
|-----------------|----------------------------|
| 9               | <a href="#">69 (88.5%)</a> |

Does this property have any of the following: (check all that apply)

*(property\_misc\_items)*

| Total Count (N) | Missing                  | Unique |
|-----------------|--------------------------|--------|
| 74              | <a href="#">4 (5.1%)</a> | 8      |

**Counts/frequency:** Woodpile (46, 62.2%), Kennel (5, 6.8%), Chicken Coop (12, 16.2%), Construction Debris (26, 35.1%), Abandoned Car (13, 17.6%), Busted concrete pile (11, 14.9%), Wood or stone bordered beds (36, 48.6%), None (13, 17.6%)

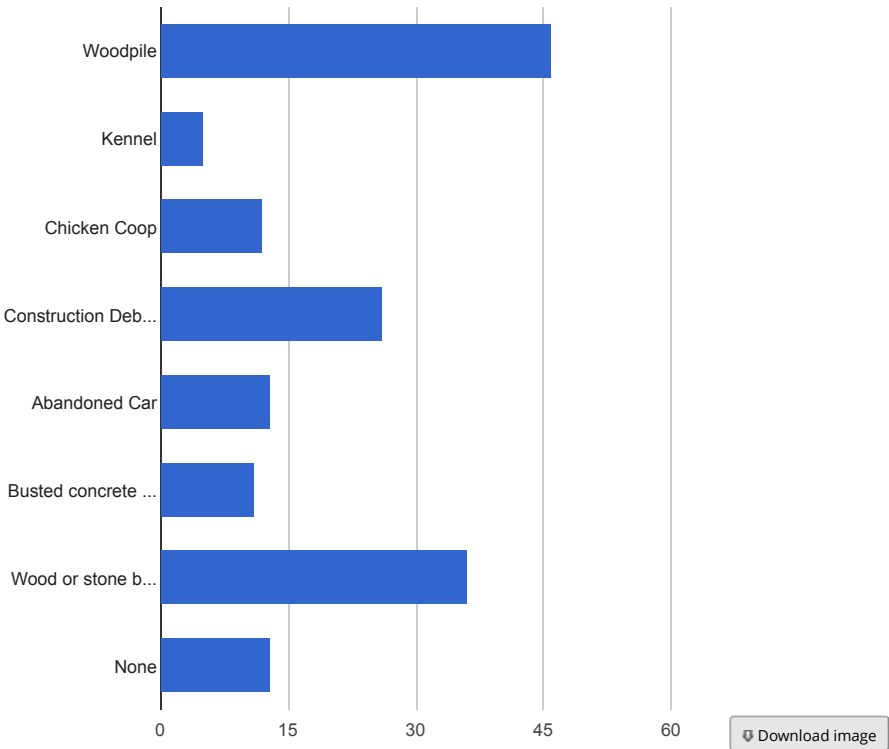

OTHER Additional Notes: *(property\_other\_add\_notes)*

| Total Count (N) | Missing                    |
|-----------------|----------------------------|
| 10              | <a href="#">68 (87.2%)</a> |

Does the property have landscaping (purposely planted vegetation) on any of the exterior walls of the residence? *(environ\_plants\_ext\_y\_n)*

| Total Count (N) | Missing                  | Unique |
|-----------------|--------------------------|--------|
| 77              | <a href="#">1 (1.3%)</a> | 2      |

Counts/frequency: **Yes** (35, 45.5%), **No** (42, 54.5%)

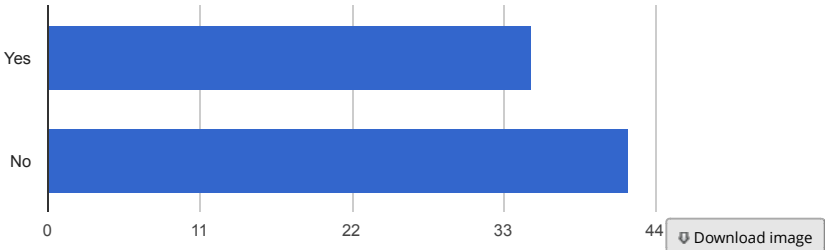

If "yes", does the landscaping encircle the house? **Yes (landscaping encircles house)** **No (some non-maintained vegetation or landscaping is adjacent to house)** *(lanscape\_encircle\_y\_n)*

| Total Count (N) | Missing | Unique |
|-----------------|---------|--------|
|                 |         |        |

|    |                            |   |
|----|----------------------------|---|
| 35 | <a href="#">43 (55.1%)</a> | 2 |
|----|----------------------------|---|

Counts/frequency: **Yes** (14, 40.0%), **No** (21, 60.0%)

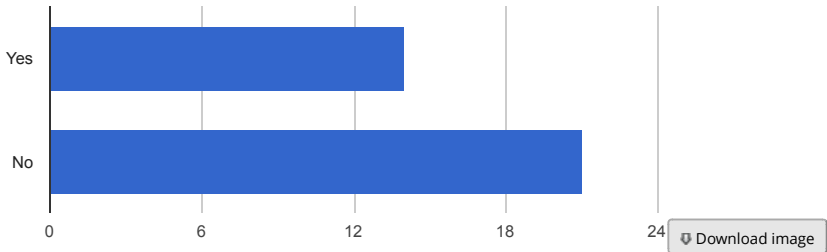

**How well maintained is the landscaping? 2 (well maintained, few weeds) 1 (poorly maintained, over-run with weeds) NA No landscaping** *(landscaping\_maintained)*

| Total Count (N) | Missing                  | Unique |
|-----------------|--------------------------|--------|
| 76              | <a href="#">2 (2.6%)</a> | 3      |

Counts/frequency: **2** (52, 68.4%), **1** (5, 6.6%), **NA** (19, 25.0%)

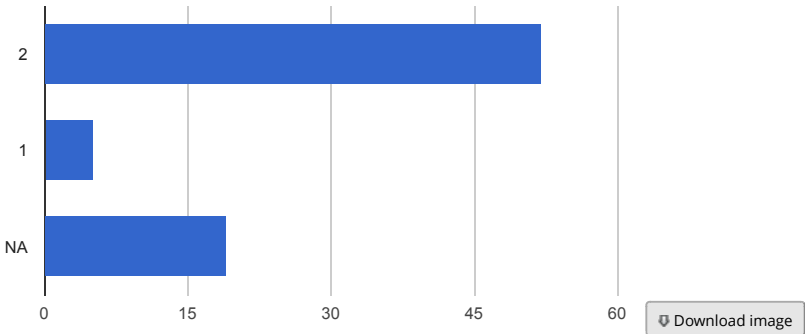

**Survey COMMENTS:** *(survey\_comments)*

| Total Count (N) | Missing                    |
|-----------------|----------------------------|
| 8               | <a href="#">70 (89.7%)</a> |

**Complete?** *(tucson\_homepersonal\_data\_collection\_instrument\_complete)*

| Total Count (N) | Missing  | Unique |
|-----------------|----------|--------|
| 78              | 0 (0.0%) | 2      |

Counts/frequency: **Incomplete** (1, 1.3%), **Unverified** (0, 0.0%), **Complete** (77, 98.7%)

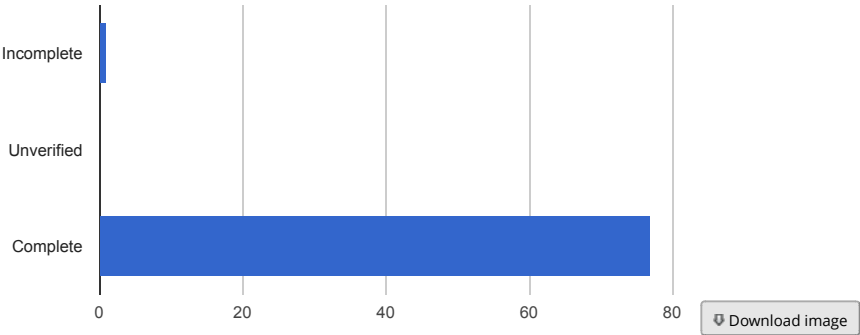

Supplement: s1 [file s1]
